# Supplementary material for: β-cyclodextrin dendritic derivatives as permeation mediators to enhance the in vitro albendazole cysticidal activity by the improvement of the diffusion component
Source: Royal Society of Chemistry journal article supplement (doi:10.1039/d2ra03314c), 2022-01-01
Supplement: d2ra03314c1.pdf [file d2ra03314c1.pdf]

## Supporting Information

### $\beta$ -cyclodextrin dendritic derivatives as permeation mediators to enhance the in vitro albendazole cysticidal activity by the improvement of the diffusion component

Luis José López-Méndez<sup>a</sup>, Francisca Palomares-Alonso<sup>b</sup>, Iliana González-Hernández, Helgi Jung-Cook<sup>b,c</sup>, Neyra Citlali Cabrera-Quñones<sup>a</sup>, Patricia Guadarrama.<sup>a,\*</sup>

<sup>a</sup> Instituto de Investigaciones en Materiales, Universidad Nacional Autónoma de México, Mexico City, 04510, México.

<sup>b</sup> Laboratorio de Neuropsicofarmacología, Instituto Nacional de Neurología y Neurocirugía, Mexico City, 14269, México.

<sup>c</sup> Facultad de Química, Departamento de Farmacia, Universidad Nacional Autónoma de México, Mexico City 04510, México.

\*Corresponding author. E-mail address: [patriciagua@materiales.unam.mx](mailto:patriciagua@materiales.unam.mx)

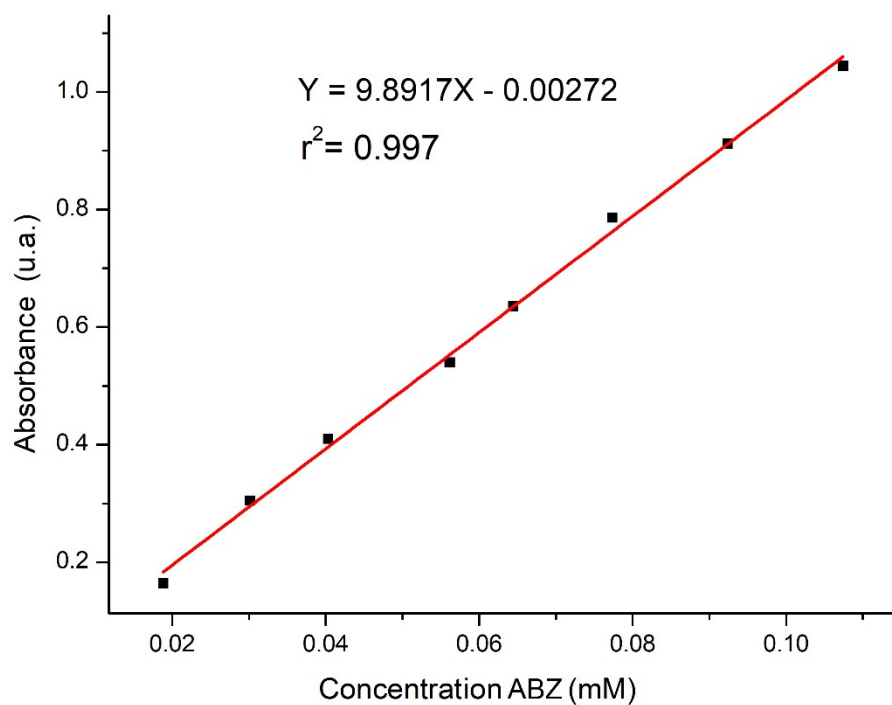

**Fig. S1.** Calibration curve of ABZ in methanol to its quantification in inclusion complexes.

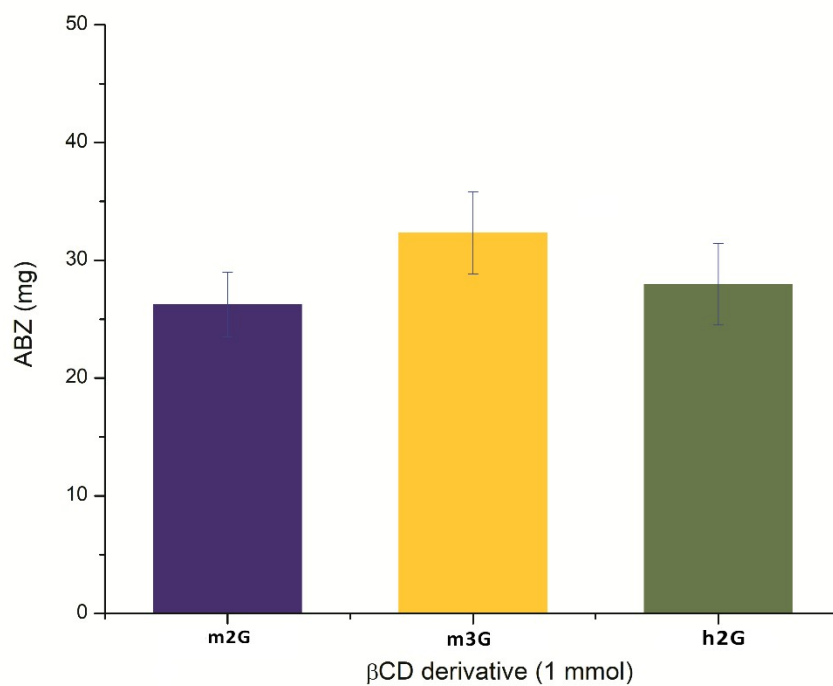

**Fig. S2.** Quantification of ABZ in inclusion complexes.

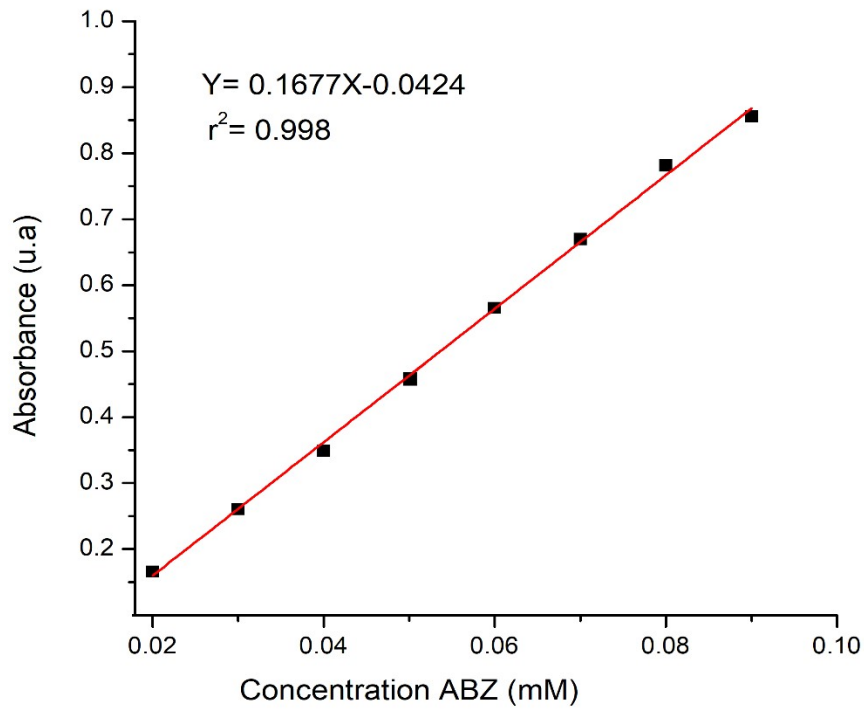

**Fig. S3.** Calibration curve of ABZ in octanol to its quantification in extraction biphasic experiments.

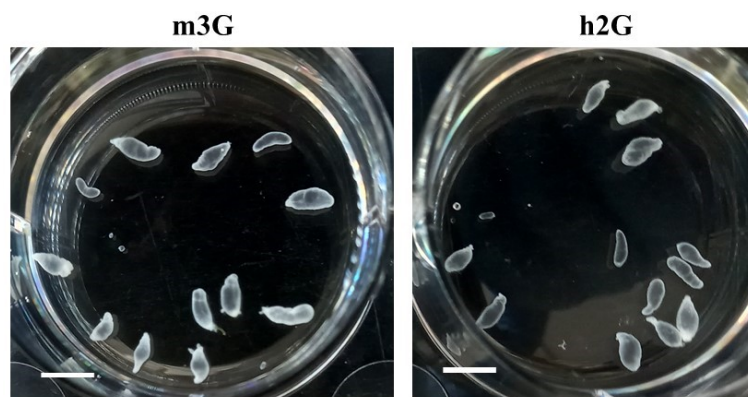

**Fig. S4.** Morphological appearance of *T. crassiceps* cysts after *in vitro* treatments of **m3G** and **h2G** dendritic nanocarriers (7.24  $\mu$ M).
